# Supplementary material for: The Validity and Reproducibility of Dietary Non-enzymatic Antioxidant Capacity Estimated by Self-administered Food Frequency Questionnaires
Source: PubMed Central journal article supplement (PMC6143376; doi:10.2188/jea.je20170063), 2018-10-05
Supplement: je-28-428-s001.pdf [file je-28-428-s001.pdf]

**eTable 1.** Dietary antioxidant capacity of the food and beverage groups in men (n=244)

| Food                                   | FFQ _R <sup>a</sup> |       | Contribution<br>(%) | FFQ _V <sup>b</sup> |       | Contribution<br>(%) | 28day-DR <sup>c</sup> |       | Contribution<br>(%) |
|----------------------------------------|---------------------|-------|---------------------|---------------------|-------|---------------------|-----------------------|-------|---------------------|
|                                        | Mean                | SD    |                     | Mean                | SD    |                     | Mean                  | SD    |                     |
| FRAP, $\mu\text{mol Fe}^{2+}/\text{d}$ |                     |       |                     |                     |       |                     |                       |       |                     |
| Crude values                           |                     |       |                     |                     |       |                     |                       |       |                     |
| Total food                             | 15,753              | 9,823 |                     | 14,591              | 8,526 |                     | 9,013                 | 4,741 |                     |
| Cereals                                | 444                 | 361   | 2.8                 | 405                 | 316   | 2.8                 | 264                   | 191   | 2.9                 |
| Potatoes                               | 73                  | 75    | 0.5                 | 71                  | 75    | 0.5                 | 89                    | 62    | 1.0                 |
| Nuts and seeds                         | 9                   | 15    | 0.1                 | 6                   | 9     | 0.0                 | 58                    | 152   | 0.6                 |
| Vegetables                             | 1,243               | 830   | 7.9                 | 1,261               | 941   | 8.6                 | 1,459                 | 514   | 16.2                |
| Fruits                                 | 1,840               | 1,549 | 11.7                | 1,933               | 1,798 | 13.2                | 736                   | 529   | 8.2                 |
| Mushrooms                              | 298                 | 290   | 1.9                 | 285                 | 259   | 2.0                 | 272                   | 172   | 3.0                 |
| Confectioneries                        | 65                  | 112   | 0.4                 | 62                  | 119   | 0.4                 | 24                    | 61    | 0.3                 |
| Beverages                              | 11,778              | 8,964 | 74.8                | 10,565              | 7,638 | 72.4                | 6,098                 | 4,253 | 67.7                |
| Green tea                              | 11,184              | 9,031 | 71.0                | 9,856               | 7,738 | 67.5                | 5,417                 | 4,232 | 60.1                |
| Energy adjustment (residual method)    |                     |       |                     |                     |       |                     |                       |       |                     |
| Total food                             | 15,418              | 9,203 |                     | 14,212              | 7,825 |                     | 8,978                 | 4,593 |                     |
| Cereals                                | 425                 | 315   | 2.8                 | 396                 | 311   | 2.8                 | 257                   | 181   | 2.9                 |
| Potatoes                               | 71                  | 66    | 0.5                 | 66                  | 65    | 0.5                 | 88                    | 57    | 1.0                 |
| Nuts and seeds                         | 8                   | 15    | 0.1                 | 7                   | 15    | 0.0                 | 62                    | 197   | 0.7                 |
| Vegetables                             | 1,182               | 659   | 7.7                 | 1,185               | 743   | 8.3                 | 1,445                 | 464   | 16.1                |
| Fruits                                 | 1,725               | 1,342 | 11.2                | 1,796               | 1,286 | 12.6                | 734                   | 526   | 8.2                 |
| Mushrooms                              | 294                 | 307   | 1.9                 | 266                 | 236   | 1.9                 | 272                   | 171   | 3.0                 |

|                 |        |        |      |        |        |      |       |       |      |
|-----------------|--------|--------|------|--------|--------|------|-------|-------|------|
| Confectioneries | 69     | 145    | 0.4  | 61     | 104    | 0.4  | 24    | 60    | 0.3  |
| Beverages       | 11,784 | 9,202  | 76.4 | 10,652 | 8,302  | 75.0 | 6,090 | 4,159 | 67.8 |
| Green tea       | 12,562 | 13,302 | 81.5 | 10,592 | 10,581 | 74.5 | 5,429 | 4,167 | 60.5 |

ORAC,  $\mu\text{mol TE/d}$

Crude values

|                 |       |       |      |       |       |      |       |       |      |
|-----------------|-------|-------|------|-------|-------|------|-------|-------|------|
| Total food      | 8,343 | 4,570 |      | 8,053 | 4,532 |      | 5,764 | 2,420 |      |
| Cereals         | 519   | 636   | 6.2  | 448   | 554   | 5.6  | 165   | 292   | 2.9  |
| Potatoes        | 215   | 201   | 2.6  | 200   | 197   | 2.5  | 246   | 138   | 4.3  |
| Nuts and seeds  | 85    | 139   | 1.0  | 58    | 86    | 0.7  | 53    | 94    | 0.9  |
| Vegetables      | 1,258 | 873   | 15.1 | 1,281 | 917   | 15.9 | 2,002 | 748   | 34.7 |
| Fruits          | 2,617 | 2,102 | 31.4 | 2,757 | 2,544 | 34.2 | 1,291 | 978   | 22.4 |
| Mushrooms       | 52    | 51    | 0.6  | 50    | 45    | 0.6  | 47    | 30    | 0.8  |
| Confectioneries | 110   | 190   | 1.3  | 105   | 202   | 1.3  | 64    | 181   | 1.1  |
| Beverages       | 3,485 | 2,682 | 41.8 | 3,151 | 2,334 | 39.1 | 1,766 | 1,323 | 30.6 |
| Green tea       | 3,293 | 2,659 | 39.5 | 2,902 | 2,279 | 36.0 | 1,595 | 1,246 | 27.7 |

Energy adjustment (residual method)

|                |       |       |      |       |       |      |       |       |      |
|----------------|-------|-------|------|-------|-------|------|-------|-------|------|
| Total food     | 8,055 | 3,841 |      | 7,725 | 3,607 |      | 5,731 | 2,304 |      |
| Cereals        | 541   | 866   | 6.7  | 803   | 2,002 | 10.4 | 166   | 291   | 2.9  |
| Potatoes       | 210   | 180   | 2.6  | 184   | 158   | 2.4  | 246   | 135   | 4.3  |
| Nuts and seeds | 87    | 166   | 1.1  | 94    | 277   | 1.2  | 69    | 165   | 1.2  |
| Vegetables     | 1,184 | 674   | 14.7 | 1,189 | 759   | 15.4 | 1,976 | 678   | 34.5 |
| Fruits         | 2,468 | 1,845 | 30.6 | 2,570 | 1,902 | 33.3 | 1,282 | 952   | 22.4 |

|                 |       |       |      |       |       |      |       |       |      |
|-----------------|-------|-------|------|-------|-------|------|-------|-------|------|
| Mushrooms       | 50    | 50    | 0.6  | 46    | 40    | 0.6  | 47    | 30    | 0.8  |
| Confectioneries | 118   | 254   | 1.5  | 104   | 179   | 1.3  | 64    | 181   | 1.1  |
| Beverages       | 3,480 | 2,706 | 43.2 | 3,269 | 2,848 | 42.3 | 1,769 | 1,306 | 30.9 |
| Green tea       | 3,621 | 3,689 | 45.0 | 3,072 | 2,964 | 39.8 | 1,598 | 1,226 | 27.9 |

TRAP,  $\mu\text{mol TE/d}$

Crude values

|                 |       |       |      |       |       |      |       |       |      |
|-----------------|-------|-------|------|-------|-------|------|-------|-------|------|
| Total food      | 6,175 | 4,130 |      | 5,650 | 3,568 |      | 3,426 | 3,718 |      |
| Cereals         | 66    | 73    | 1.1  | 58    | 64    | 1.0  | 30    | 61    | 0.9  |
| Potatoes        | 17    | 17    | 0.3  | 16    | 17    | 0.3  | 21    | 15    | 0.6  |
| Nuts and seeds  | 1     | 2     | 0.0  | 1     | 1     | 0.0  | 4     | 2     | 0.1  |
| Vegetables      | 480   | 325   | 7.8  | 471   | 336   | 8.3  | 601   | 284   | 17.5 |
| Fruits          | 643   | 528   | 10.4 | 670   | 612   | 11.9 | 292   | 519   | 8.5  |
| Mushrooms       | 114   | 111   | 1.8  | 109   | 99    | 1.9  | 104   | 103   | 3.0  |
| Confectioneries | 18    | 31    | 0.3  | 17    | 33    | 0.3  | 8     | 33    | 0.2  |
| Beverages       | 4,835 | 3,836 | 78.3 | 4,308 | 3,276 | 76.2 | 2,363 | 3,720 | 69.0 |
| Green tea       | 4,741 | 3,828 | 76.8 | 4,178 | 3,280 | 73.9 | 2,296 | 1,794 | 67.0 |

Energy adjustment (residual method)

|                |       |       |     |       |       |     |       |       |      |
|----------------|-------|-------|-----|-------|-------|-----|-------|-------|------|
| Total food     | 6,057 | 3,925 |     | 5,514 | 3,388 |     | 3,417 | 1,962 |      |
| Cereals        | 65    | 81    | 1.1 | 57    | 70    | 1.0 | 29    | 42    | 0.8  |
| Potatoes       | 16    | 15    | 0.3 | 15    | 15    | 0.3 | 20    | 13    | 0.6  |
| Nuts and seeds | 1     | 2     | 0.0 | 1     | 1     | 0.0 | 4     | 11    | 0.1  |
| Vegetables     | 454   | 250   | 7.5 | 442   | 288   | 8.0 | 595   | 175   | 17.4 |

|                 |       |       |      |       |       |      |       |       |      |
|-----------------|-------|-------|------|-------|-------|------|-------|-------|------|
| Fruits          | 602   | 456   | 9.9  | 623   | 441   | 11.3 | 291   | 204   | 8.5  |
| Mushrooms       | 111   | 112   | 1.8  | 101   | 89    | 1.8  | 104   | 65    | 3.0  |
| Confectioneries | 18    | 36    | 0.3  | 16    | 28    | 0.3  | 8     | 20    | 0.2  |
| Beverages       | 5,008 | 4,416 | 82.7 | 4,608 | 4,453 | 83.6 | 2,366 | 1,797 | 69.2 |
| Green tea       | 5,245 | 5,405 | 86.6 | 4,441 | 4,330 | 80.5 | 2,300 | 1,765 | 67.3 |

FFQ, food frequency questionnaire; DR, dietary record; SD, standard deviation; TE, trolox equivalent; FRAP, ferric reducing-antioxidant power; ORAC, oxygen radical absorbance capacity; TRAP, total radical-trapping antioxidant parameter.

<sup>a</sup> FFQ\_R was administered 1 year after and before FFQ\_V.

<sup>b</sup> FFQ\_V was administered 1 year after completion of the DRs.

<sup>c</sup> DR was collected over a 1-year period.

**eTable 2.** Dietary antioxidant capacity of the food and beverage groups in women (n=253)

| Food                                   | FFQ_R <sup>a</sup> |        | Contribution (%) | FFQ_V <sup>b</sup> |        | Contribution (%) | 28day-DR <sup>c</sup> |       | Contribution (%) |
|----------------------------------------|--------------------|--------|------------------|--------------------|--------|------------------|-----------------------|-------|------------------|
|                                        | Mean               | SD     |                  | Mean               | SD     |                  | Mean                  | SD    |                  |
| FRAP, $\mu\text{mol Fe}^{2+}/\text{d}$ |                    |        |                  |                    |        |                  |                       |       |                  |
| Crude values                           |                    |        |                  |                    |        |                  |                       |       |                  |
| Total food                             | 16,077             | 10,047 |                  | 15,627             | 10,054 |                  | 8,751                 | 4,461 |                  |
| Cereals                                | 340                | 243    | 2.1              | 339                | 259    | 2.2              | 182                   | 121   | 2.1              |
| Potatoes                               | 84                 | 70     | 0.5              | 84                 | 84     | 0.5              | 81                    | 48    | 0.9              |
| Nuts and seeds                         | 7                  | 11     | 0.0              | 7                  | 17     | 0.0              | 76                    | 181   | 0.9              |
| Vegetables                             | 1,503              | 1,129  | 9.3              | 1,464              | 1,166  | 9.4              | 1,375                 | 497   | 15.7             |
| Fruits                                 | 2,523              | 2,498  | 15.7             | 2,564              | 2,595  | 16.4             | 1,065                 | 598   | 12.2             |
| Mushrooms                              | 342                | 283    | 2.1              | 341                | 321    | 2.2              | 256                   | 152   | 2.9              |
| Confectioneries                        | 104                | 168    | 0.6              | 94                 | 148    | 0.6              | 46                    | 97    | 0.5              |
| Beverages                              | 11,171             | 8,523  | 69.5             | 10,731             | 8,509  | 68.7             | 5,655                 | 4,049 | 64.6             |
| Green tea                              | 10,893             | 8,499  | 67.8             | 10,439             | 8,488  | 66.8             | 5,442                 | 3,999 | 62.2             |
| Energy adjustment (residual method)    |                    |        |                  |                    |        |                  |                       |       |                  |
| Total food                             | 15,793             | 8,913  |                  | 15,240             | 9,292  |                  | 8,740                 | 4,498 |                  |
| Cereals                                | 329                | 214    | 2.1              | 330                | 236    | 2.2              | 177                   | 112   | 2.0              |
| Potatoes                               | 81                 | 64     | 0.5              | 78                 | 65     | 0.5              | 81                    | 45    | 0.9              |
| Nuts and seeds                         | 7                  | 14     | 0.0              | 6                  | 14     | 0.0              | 82                    | 248   | 0.9              |
| Vegetables                             | 1,450              | 957    | 9.2              | 1,348              | 762    | 8.8              | 1,362                 | 469   | 15.6             |
| Fruits                                 | 2,282              | 1,486  | 14.4             | 2,250              | 1,447  | 14.8             | 1,039                 | 551   | 11.9             |

|                 |        |       |      |        |       |      |       |       |      |
|-----------------|--------|-------|------|--------|-------|------|-------|-------|------|
| Mushrooms       | 333    | 256   | 2.1  | 318    | 282   | 2.1  | 254   | 153   | 2.9  |
| Confectioneries | 108    | 191   | 0.7  | 94     | 151   | 0.6  | 44    | 85    | 0.5  |
| Beverages       | 11,104 | 8,272 | 70.3 | 10,674 | 8,519 | 70.0 | 5,688 | 4,147 | 65.1 |
| Green tea       | 10,853 | 8,344 | 68.7 | 10,403 | 8,596 | 68.3 | 5,477 | 4,101 | 62.7 |

ORAC,  $\mu\text{mol TE/d}$

Crude values

|                 |       |       |      |       |       |      |       |       |      |
|-----------------|-------|-------|------|-------|-------|------|-------|-------|------|
| Total food      | 9,346 | 5,407 |      | 9,260 | 5,824 |      | 6,100 | 2,148 |      |
| Cereals         | 381   | 410   | 4.1  | 388   | 469   | 4.2  | 100   | 176   | 1.6  |
| Potatoes        | 248   | 186   | 2.7  | 257   | 252   | 2.8  | 248   | 124   | 4.1  |
| Nuts and seeds  | 65    | 101   | 0.7  | 62    | 158   | 0.7  | 50    | 74    | 0.8  |
| Vegetables      | 1,418 | 891   | 15.2 | 1,425 | 1,115 | 15.4 | 1,835 | 658   | 30.1 |
| Fruits          | 3,585 | 3,334 | 38.4 | 3,624 | 3,522 | 39.1 | 1,807 | 1,071 | 29.6 |
| Mushrooms       | 60    | 49    | 0.6  | 60    | 56    | 0.6  | 45    | 27    | 0.7  |
| Confectioneries | 176   | 284   | 1.9  | 160   | 250   | 1.7  | 127   | 280   | 2.1  |
| Beverages       | 3,410 | 2,488 | 36.5 | 3,282 | 2,513 | 35.4 | 1,768 | 1,176 | 29.0 |
| Green tea       | 3,207 | 2,503 | 34.3 | 3,074 | 2,499 | 33.2 | 1,602 | 1,177 | 26.3 |

Energy adjustment (residual method)

|                |       |       |      |       |       |      |       |       |      |
|----------------|-------|-------|------|-------|-------|------|-------|-------|------|
| Total food     | 8,998 | 3,764 |      | 8,748 | 4,014 |      | 6,051 | 2,057 |      |
| Cereals        | 376   | 424   | 4.2  | 482   | 826   | 5.5  | 101   | 179   | 1.7  |
| Potatoes       | 236   | 160   | 2.6  | 230   | 163   | 2.6  | 247   | 123   | 4.1  |
| Nuts and seeds | 86    | 212   | 1.0  | 69    | 194   | 0.8  | 56    | 104   | 0.9  |
| Vegetables     | 1,365 | 737   | 15.2 | 1,305 | 672   | 14.9 | 1,816 | 625   | 30.0 |

|                                     |       |       |      |       |       |      |       |       |      |
|-------------------------------------|-------|-------|------|-------|-------|------|-------|-------|------|
| Fruits                              | 3,267 | 2,050 | 36.3 | 3,208 | 2,062 | 36.7 | 1,752 | 963   | 29.0 |
| Mushrooms                           | 58    | 45    | 0.6  | 56    | 49    | 0.6  | 44    | 27    | 0.7  |
| Confectioneries                     | 186   | 334   | 2.1  | 160   | 261   | 1.8  | 125   | 307   | 2.1  |
| Beverages                           | 3,393 | 2,413 | 37.7 | 3,272 | 2,532 | 37.4 | 1,774 | 1,193 | 29.3 |
| Green tea                           | 3,194 | 2,452 | 35.5 | 3,063 | 2,529 | 35.0 | 1,611 | 1,203 | 26.6 |
| TRAP, $\mu\text{mol TE/d}$          |       |       |      |       |       |      |       |       |      |
| Crude values                        |       |       |      |       |       |      |       |       |      |
| Total food                          | 6,400 | 4,110 |      | 6,199 | 4,121 |      | 3,510 | 1,857 |      |
| Cereals                             | 50    | 50    | 0.8  | 50    | 54    | 0.8  | 20    | 25    | 0.6  |
| Potatoes                            | 19    | 16    | 0.3  | 19    | 19    | 0.3  | 19    | 11    | 0.5  |
| Nuts and seeds                      | 1     | 2     | 0.0  | 1     | 3     | 0.0  | 5     | 12    | 0.1  |
| Vegetables                          | 563   | 393   | 8.8  | 535   | 410   | 8.6  | 551   | 185   | 15.7 |
| Fruits                              | 881   | 856   | 13.8 | 892   | 908   | 14.4 | 419   | 237   | 11.9 |
| Mushrooms                           | 131   | 108   | 2.0  | 130   | 123   | 2.1  | 98    | 58    | 2.8  |
| Confectioneries                     | 29    | 46    | 0.5  | 26    | 41    | 0.4  | 15    | 32    | 0.4  |
| Beverages                           | 4,725 | 3,613 | 73.8 | 4,544 | 3,608 | 73.3 | 2,378 | 1,712 | 67.7 |
| Green tea                           | 4,618 | 3,603 | 72.2 | 4,425 | 3,598 | 71.4 | 2,307 | 1,695 | 65.7 |
| Energy adjustment (residual method) |       |       |      |       |       |      |       |       |      |
| Total food                          | 6,299 | 3,711 |      | 6,064 | 3,884 |      | 3,508 | 1,872 |      |
| Cereals                             | 48    | 46    | 0.8  | 50    | 54    | 0.8  | 20    | 25    | 0.6  |
| Potatoes                            | 19    | 15    | 0.3  | 18    | 15    | 0.3  | 19    | 11    | 0.5  |
| Nuts and seeds                      | 1     | 2     | 0.0  | 1     | 2     | 0.0  | 5     | 13    | 0.1  |
| Vegetables                          | 543   | 331   | 8.6  | 493   | 262   | 8.1  | 546   | 172   | 15.6 |

|                 |       |       |      |       |       |      |       |       |      |
|-----------------|-------|-------|------|-------|-------|------|-------|-------|------|
| Fruits          | 798   | 507   | 12.7 | 783   | 502   | 12.9 | 409   | 220   | 11.7 |
| Mushrooms       | 127   | 98    | 2.0  | 121   | 108   | 2.0  | 97    | 59    | 2.8  |
| Confectioneries | 29    | 48    | 0.5  | 25    | 39    | 0.4  | 15    | 30    | 0.4  |
| Beverages       | 4,710 | 3,557 | 74.8 | 4,519 | 3,606 | 74.5 | 2,389 | 1,744 | 68.1 |
| Green tea       | 4,599 | 3,532 | 73.0 | 4,409 | 3,642 | 72.7 | 2,320 | 1,734 | 66.1 |

FFQ, food frequency questionnaire; DR, dietary record; SD, standard deviation; TE, trolox equivalent; FRAP, ferric reducing-antioxidant power; ORAC, oxygen radical absorbance capacity; TRAP, total radical-trapping antioxidant parameter.

<sup>a</sup> FFQ\_R was administered 1 year after and before FFQ\_V.

<sup>b</sup> FFQ\_V was administered 1 year after completion of the DRs.

<sup>c</sup> DR was collected over a 1-year period.
